# Supplementary material for: Detection and quantification of the Bcr/Abl chimeric protein on biochips using LDI-TOF MS
Source: Royal Society of Chemistry journal article supplement (doi:10.1039/c4cc01332h), 2014-01-01
Supplement: c4cc01332h1.pdf [file c4cc01332h1.pdf]

## Supporting Information

### Detection and Quantification of the Bcr/Abl Chimeric Protein on Biochips using LDI-TOF MS

Seol-Hye Hong, Jae Il Kim, Hyunook Kang, Soojin Yoon, Dong-Eun Kim, Woong Jung, and

Woon-Seok Yeo\*

#### 1. Materials and Methods

**Materials.** AuNPs (40 nm in diameter) were prepared by using the previously explicated method.<sup>1</sup> Gold chips were prepared by vacuum deposition of titanium (10 Å) followed by gold (50 Å) onto glass slides. Sodium borohydride, sodium citrate, cobalt chloride, ammonium acetate, 1-ethyl-3-(3-dimethylaminopropyl) carbodiimide hydrochloride (EDC), N-hydroxysuccinimide (NHS), dimethyl sulfoxide (DMSO), and all chemical reagents for the synthesis were purchased from Sigma-Aldrich (St. Louis, MO, USA), unless otherwise specified. Ethylene glycol-D4 (isotope labeling percentage 98%) was purchased from Cambridge Isotope Laboratories, Inc. (Fr. Andover, MA, USA). Hydrogen tetrachloroaurate(III) hydrate (HAuCl<sub>4</sub>) was purchased from Kojima chemicals Co., Ltd. (Sayama-shi, Japan). Ethanol was purchased from Merck (Darmstadt, Germany). Anti-Abl, Anti-Bcr, and anti-β-actin were purchased from Santa Cruz Biotechnology, Inc. (CA, USA). Polyvinylidene difluoride membrane was purchased from Millipore (Billerica, MA, USA). Phosphate buffered saline (PBS), RPMI-1640 medium, bovine calf serum, Genecticin (G418), and antibiotics (100 U/mL penicillin G and 100 mg/mL streptomycin) were purchased from WelGene biopharmaceuticals (Daegu, Korea).

**Preparation of anti-Abl presenting biochips.** Gold chips were cleaned in piranha solution (sulfuric acid : hydrogen peroxide = 7:3. Caution! Extremely hot and corrosive) before use. The gold chips were incubated in a mixed solution of tri(ethylene glycol)-terminated alkanethiol (1mM in ethanol) and carboxylic penta(ethylene glycol)-terminated alkanethiol (1mM in ethanol) in a ratio of 95 : 5 for 12 h. After incubation, the gold chips were washed with ethanol, and dried under a stream of nitrogen. 7  $\mu$ L NHS (10 mg/mL in PBS) and 3  $\mu$ L EDC (20 mg/mL in PBS) were applied to carboxylic acid-presenting gold chips for 2 h and then the chips were washed with PBS. The resulting NHS-activated ester-presenting chips were incubated with 5  $\mu$ L anti-Abl (0.87  $\mu$ M in phosphate buffer (PB)) for 1h. The resulting antibody-immobilized gold chips were washed with PB and stored at 4 °C until use.

**Preparation of anti-Bcr presenting gold nanoparticles (AuNPs).** As-made AuNPs (1 mL of 3.3 nM) were washed with tri-distilled water by centrifugation three times and incubated with a mixed solution of tri(ethylene glycol)-terminated alkanethiol (100  $\mu$ M in ethanol) and carboxylic acid penta(ethylene glycol)-terminated alkanethiol (100  $\mu$ M in ethanol) in a ratio of 95 : 5 for 12 h. The resulting AuNPs were washed with absolute ethanol by using centrifugation at 14,000 rpm for 3 min three times. Acid-presenting AuNPs (3.3 nM in ethanol) were treated with 350  $\mu$ L NHS (10 mg/mL in DMSO) and 150  $\mu$ L EDC (20 mg/mL in DMSO) for 2 h, and washed with DMSO and phosphate buffer (PB) by centrifugation at 14,000 rpm for 3 min. 200  $\mu$ L anti-Bcr (1.03  $\mu$ M in PB) was incubated with the above NHS-activated AuNPs for 1 h at 4 °C. The resulting antibody immobilized AuNPs were then washed with distilled water by centrifugation at 7,000 rpm for 3 min three times and stored at 4 °C until use.

**Preparation of internal standard-coated AuNPs.** As-made AuNPs (1 mL of 1.1 nM) were washed with tri-distilled water by centrifugation three times and incubated with a solution of deuterated tri(ethylene glycol)-terminated alkanethiol (100  $\mu$ M in ethanol) for 12 h. The

resulting AuNPs were washed with absolute ethanol using centrifugation at 14,000 rpm for 3 min three times and stored at 4 °C.

**Cell culture and lysis.** Murine pro-B lymphoid cell line Ba/F3 cells that express Bcr/Abl chimeric proteins were cultured in RPMI1640 medium, supplemented with heat inactivated 10% bovine calf serum and 1% antibiotics (100 U/mL penicillin G and 100 mg/mL streptomycin) at 37 °C in humidified 5% CO<sub>2</sub> atmosphere. For the sub-culture, 10% G418 (50 mg/mL) was added to media. The cells were collected from the petri dishes, then vortexed in PB (10 mM, pH 8), and treated with protease inhibitor cocktail (1×). The mixture was subjected to sonication for 2 min at 4 °C. The lysed cells were then centrifuged at 14,000 rpm for 5 min, and the supernatant was placed in a fresh tube.

**Detection of the Bcr/Abl chimeric protein in cell lysates.** Lysed cell supernatant (100 µL) was incubated with 50 µL of 100 pM anti-Bcr-presenting AuNPs for 30 min and Bcr/Abl-bound AuNPs were separated by centrifugation at 7,000 rpm for 3 min. The AuNPs were dispersed with 15 µL PB (10 mM, pH 8) and were treated on the anti-Abl presenting biochips for 30 min. The chips were rinsed with distilled water to remove unbound AuNPs and dried under a stream of nitrogen, then analyzed by LDI-TOF MS without an organic matrix.

**Quantification of Bcr/Abl chimeric proteins.** Lysed cell supernatants (100 µL) from various numbers of cells were incubated with 50 µL of 100 pM anti-Bcr presenting AuNPs for 30 min and Bcr/Abl-bound AuNPs were separated by centrifugation at 7000 rpm for 3 min. The AuNPs were dispersed with 15 µL PB (10 mM, pH 8), and were treated on the anti-Abl-presenting biochip for 30 min. The chip was rinsed with distilled water to remove unbound AuNPs and dried under a stream of nitrogen. Next, the biochip was treated with 5 µL internal standard (IS; 200 pM in ethanol) and dried at ambient conditions. The chip was then transferred to a PCR tube containing 200 µL ethanol and subjected to sonication for 30 s to separate AuNPs and ISs from the chip. The chip was removed and AuNPs and ISs were

separated by centrifugation at 14,000 rpm for 5 min. Finally, AuNPs and ISs were dispersed with 15  $\mu$ L ethanol and 1  $\mu$ L of the dispersion was analyzed by LDI-TOF MS without an organic matrix. The standard deviations were obtained from three independent experiments.

**Immunoblot analysis.** The cells were centrifuged at 13,000 rpm for 10 min and the pellet was lysed in RIPA buffer (50 mM Tris-HCl, pH 8.0, 150 mM NaCl, 0.1% SDS, 0.5% deoxycholate, 1.0% NP40, and 1 mM phenylmethanesulfonylfluoride) for 1 h on ice. The cell suspension was disrupted by sonication and pelleted at 13,000 rpm for 20 min at 4 °C. Total protein was separated by gradient SDS-PAGE (4–12% polyacrylamide). Proteins were transferred to a polyvinylidene difluoride membrane at 80 mA for 90 min. The membrane was blocked in 5 % skimmed milk for 1 h and incubated at 37 °C, and the membrane was immunoblotted with anti-c-Abl monoclonal antibody (1:500) and anti- $\beta$ -actin antibody (1:1500). The membrane was incubated with horseradish peroxidase-conjugated anti-goat immunoglobulin, and signals were detected with an enhanced chemiluminescence system (Millipore).

**LDI-TOF MS analysis.** Mass analysis was performed using an Autoflex III MALDI-TOF mass spectrometer (Bruker Daltonics) equipped with a smartbeam laser as an ionization source. The spectra were acquired with a 19 kV accelerating voltage, a 100 Hz repetition rate, and a positive mode with an average of  $\sim$ 700 shots.

## 2. Additional data

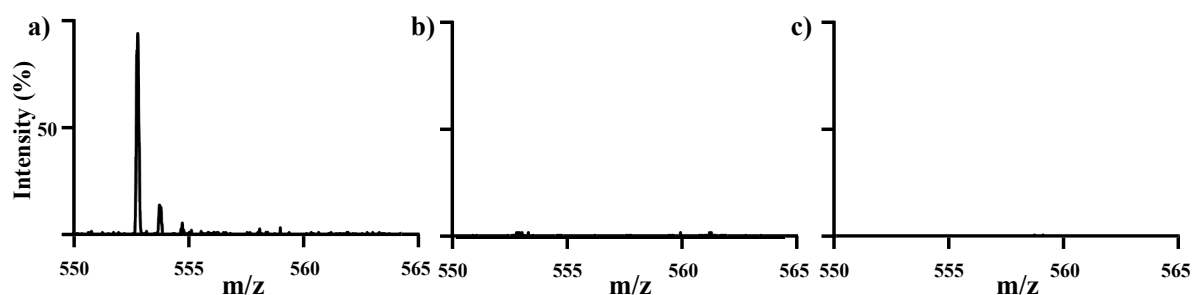

**Figure S1.** Detection of the Bcr/Abl chimeric protein in cell lysates using LDI-TOF MS. a) Am-tag signal at m/z 553 was clearly observed using anti-Bcr-coated AuNPs and anti-Abl-coated biochip. Control experiments using the anti-PSA instead of anti-Bcr on AuNPs (b) and instead of anti-Abl on a biochip (c) did not afford the peak at m/z 553.

## Reference

1. Schwartzberg A M, Olson T Y, Talley C E and Zhang J Z *J. Phys. Chem. B.* **2006**, *110*, 19935.
